# Supplementary material for: Revealing Alzheimer’s disease genes spectrum in the whole-genome by machine learning
Source: BMC Neurol. 2018 Jan 10;18:5. doi: 10.1186/s12883-017-1010-3 (PMC5763548; doi:10.1186/s12883-017-1010-3)
Supplement: Supplementary file 3 — The classification of AD-associated genes and AD-non associated genes. C1-AD: probable pathogenic genes; C2-AD: high confidence genes; C3-AD: related genes; C4-AD: possibly associated genes; C5-AD: AD-non associated genes. (XLSX 19 kb) [file 12883_2017_1010_MOESM3_ESM.xlsx]

## Sheet: Sheet1
Gene Name	Group	The Number of Case-Control Studies		The Number of Family-Based Studies
		Positive	Negative	Positive	Negative
A2M	1	11	51	6	2
UBQLN1	1	3	12	5	2
CTNNA3	1	4	9	4	1
ABCA1	1	10	10	3	1
APOE	1	62	18	3	1
CD33	1	5	2	3	1
PLAU	1	12	14	3	1
SORL1	1	15	9	2	7
SORCS1	1	2	3	2	5
ACE	1	24	29	2	3
GAB2	1	7	5	2	2
GSTO1	1		5	2	2
APOC1	1	16	2	2	1
ATXN1	1	1	5	2	1
GSK3B	1	5	1	2
IDE	1	12	24	2
PON1	1	4	6	2
PON2	1	1	5	2
PSEN1	1	19	38	1	4
BDNF	1	11	22	1	3
MAPT	1	16	30	1	3
STH	1	16	30	1	3
CHRNB2	1	1	6	1	3
CTSD	1	7	20	1	3
LMNA	1	2	9	1	3
MTHFR	1	4	24	1	3
PGBD1	1	2	9	1	3
PRNP	1	4	11	1	3
TF	1	4	11	1	3
FAS	1	5	12	1	3
GAPDH	1	4	2	1	2
NCAPD2	1	5	2	1	2
OLR1	1	5	1	1	1
TFCP2	1	6	2	1	1
ADAM10	1		5	1	1
GSTO2	1		3	1	1
TTR	1		2	1	1
APOC2	1	3	6	1
CELF2	1	3		1
KANSL2	1	2		1
LRP6	1	2	1	1
LRRTM3	1	1	2	1
TNF	1	12	8	1
TRPC4AP	1	1	2	1
BACE2	1	1	6	1
NOS3	1	6	16	1
HHEX	1	3	9	1
TGFB1	1	2	8	1
SORCS2	1		2	1
CCNT1	1		2	1
CDKN2A	1		2	1
CECR2	1		1	1
HTRA1	1		4	1
KIF18B	1		1	1
LRP8	1		3	1
NR1H2	1		2	1
NTRK2	1		3	1
SOD2	1		1	1
APP	1	4	2
PSEN2	1	2	10
CLU	2	19
TOMM40	2	17
IL6	2	15	10
BIN1	2	14
PICALM	2	14	5
IL10	2	13	6
CR1	2	12
ABCA7	2	11
MS4A6A	2	11
MS4A4E	2	11
ESR1	2	11	11
CHAT	2	9	8
ARID5B	2	6
CYP19A1	2	6	4
DAPK1	2	6	1
LPL	2	6	6
PPARG	2	6	5
EPHA1	2	5
MPO	2	5	4
ABCA2	2	4	1
APBB2	2	4	3
OTC	2	4	4
APOA4	2	3	2
ESR2	2	3	2
EXOC3L2	2	3	3
IL33	2	3	1
MAOA	2	3	1
PPM1H	2	3	1
APOD	2	3
DFNB31	2	3
HLA-DRB1	2	1(nature genetics)
HLA-DRB5	2	1(nature genetics)
INPP5D	2	1(nature genetics)
MEF2C	2	1(nature genetics)
NME8	2	1(nature genetics)
RIN3	2	1(nature genetics)
SLC24A4	2	1(nature genetics)
ZCWPW1	2	1(nature genetics)
CELF1	2	1(nature genetics)
FERMT2	2	1(nature genetics)
CASS4	2	1(nature genetics)
PTK2B	2	1(nature genetics)
BLOC1S3	2	1(8371cases)
MARK4	2	1(8371cases)
DNAJC28	2	1(462 cases)
DSG2	2	1(25580cases)
TFAM	3	5	1
PCK1	3	5	6
NCSTN	3	6	7
MME	3	5	7
VLDLR	3	6	8
CH25H	3	5	9
LDLR	3	5	9
CALHM1	3	7	10
PCDH11X	3	6	10
CYP46A1	3	12	13
BACE1	3	8	13
CST3	3	6	13
IL1B	3	10	15
BCHE	3	11	22
IL1A	3	11	23
LRP1	3	13	27
MS4A4A	3	2
COL25A1	3	2
DGKB	3	2
HPCAL1	3	2
HSD11B1	3	2
KLC1	3	2
NCAM2	3	2
PON3	3	2
SST	3	2
TLR4	3	2
ADAM9	3	1
ADRB2	3	1
AGPAT1	3	1
ALB	3	1
ARL5B	3	1
ARSB	3	1
ATF7	3	1
ATP6V0A4	3	1
C4A	3	1
CACNB2	3	1
CAV1	3	1
CCDC134	3	1
CCL3	3	1
CDK5R1	3	1
CHRNA3	3	1
COL11A1	3	1
COX10	3	1
DDX39B	3	1
DOPEY2	3	1
EPC2	3	1
EPHA4	3	1
EVA1C	3	1
F13A1	3	1
FCER1G	3	1
FGF1	3	1
GBP2	3	1
GLOD4	3	1
GNA11	3	1
GRIN3A	3	1
HBG2	3	1
HSPA5	3	1
KLF5	3	1
LRP2	3	1
LRPAP1	3	1
LRRK2	3	1
MCM3AP	3	1
MEF2A	3	1
MEFV	3	1
MICA	3	1
MYH8	3	1
NGB	3	1
NPC1	3	1
NXPH1	3	1
PARP1	3	1
PNMT	3	1
PNP	3	1
POU2F1	3	1
PPP2R2B	3	1
PRUNE2	3	1
RELN	3	1
RFC1	3	1
RGS6	3	1
RUNX1	3	1
RXRA	3	1
SAMSN1	3	1
SEL1L	3	1
SEPT3	3	1
SERPINA1	3	1
SREBF1	3	1
TET1	3	1
TMEM132C	3	1
TMPRSS15	3	1
TP63	3	1
TREM2	3	1
UBE2I	3	1
ZNF292	3	1
LHCGR	3	1
NEDD9	4	4	6
HFE	4	4	9
IL1RN	4	4	9
ECE1	4	3	2
POMT1	4	3	1
SOAT1	4	3	5
TRAK2	4	3	3
VEGFA	4	3	4
HMGCS2	4	3	6
SLC6A4	4	3	9
CD2AP	4	2	3
AGER	4	2	1
ALDH2	4	2	2
CDK1	4	2	2
CHRNA4	4	2	2
DNMBP	4	2	2
GSTM3	4	2	1
GSTP1	4	2	2
HMGCR	4	2	2
IL18	4	2	1
NOS1	4	2	1
PCGF5	4	2	2
CHRNA7	4	2	4
GALP	4	2	3
GAPDHS	4	2	4
MTHFD1L	4	2	4
PTGS2	4	2	3
WWC1	4	2	3
COMT	4	2	2
S100B	4	2
PCED1B	4	2	1
ABCG1	4	2	6
ACAN	4	2	3
ALDH18A1	4	2	3
APBB1	4	2	3
BLMH	4	2	7
CDK5	4	2	3
CETP	4	2	8
CTSS	4	2	4
DLST	4	2	8
DSC1	4	2	1
EBF3	4	2	6
FDPS	4	2	5
GOLM1	4	2	5
GRN	4	2	3
HTR6	4	2	3
MMP3	4	2	4
MYH13	4	2	5
PIN1	4	2	5
TAP2	4	2	2
TNK1	4	2	4
UBD	4	2	7
KCNJ6	4	1	1
APBA1	4	1	1
C4B	4	1	1
DKK1	4	1	1
DPYS	4	1	1
LCK	4	1	1
MC2R	4	1	1
SIGMAR1	4	1	1
AHSG	4	1	1
APOA5	4	1	1
AR	4	1	1
DLD	4	1	1
CHD4	4	1	1
CHRFAM7A	4	1	1
LPAR5	4	1	1
MMP1	4	1	1
NTRK1	4	1	1
SERPINF2	4	1	1
SYN3	4	1	1
TAPBPL	4	1	1
TRAF2	4	1	1
UCHL1	4	1	1
VDR	4	1	1
ABCC2	4	1	2
ACAD8	4	1	5
ADAM12	4	1	2
AGT	4	1	4
ALOX5	4	1	2
ANK3	4	1	5
APH1A	4	1	2
APH1B	4	1	4
APOA1	4	1	3
BCAM	4	1	3
BCR	4	1	5
CAND1	4	1	2
CARD8	4	1	2
CBS	4	1	2
CCL2	4	1	4
CCR2	4	1	3
CD36	4	1	2
CDKN2B-AS1	4	1	3
CFH	4	1	3
CLPTM1	4	1	3
COX15	4	1	2
CRP	4	1	2
CSK	4	1	2
DHCR24	4	1	2
DNM2	4	1	2
DYRK1A	4	1	3
EFNA5	4	1	2
EIF2AK2	4	1	3
ENTPD7	4	1	3
FAM63A	4	1	5
GNB3	4	1	2
GRIN2B	4	1	4
GSTM1	4	1	4
GSTT1	4	1	2
HSPG2	4	1	3
ICAM1	4	1	2
IGF1	4	1	2
IREB2	4	1	2
LIPA	4	1	8
LIPC	4	1	6
LRAT	4	1	3
MAGI2	4	1	2
MAPK8IP1	4	1	3
MTR	4	1	7
NAT2	4	1	2
NPC2	4	1	5
NQO1	4	1	3
OGG1	4	1	2
PIK3R1	4	1	3
PLAT	4	1	2
PPARA	4	1	6
PPP1R3A	4	1	3
PRND	4	1	2
SERPINE1	4	1	4
SGPL1	4	1	2
SNCA	4	1	2
SOS2	4	1	2
TARDBP	4	1	2
TMEM63C	4	1	2
TP53	4	1	2
VCP	4	1	3
